# Supplementary material for: Population Genetic Structure and Post-Establishment Dispersal Patterns of the Red Swamp Crayfish Procambarus Clarkii in China
Source: PLOS journal article supplement (doi:10.1371/journal.pone.0040652), 2012-07-10
Supplement: S2 (10.1371/journal.pone.0040652.s002) [file journal.pone.0040652.s002]

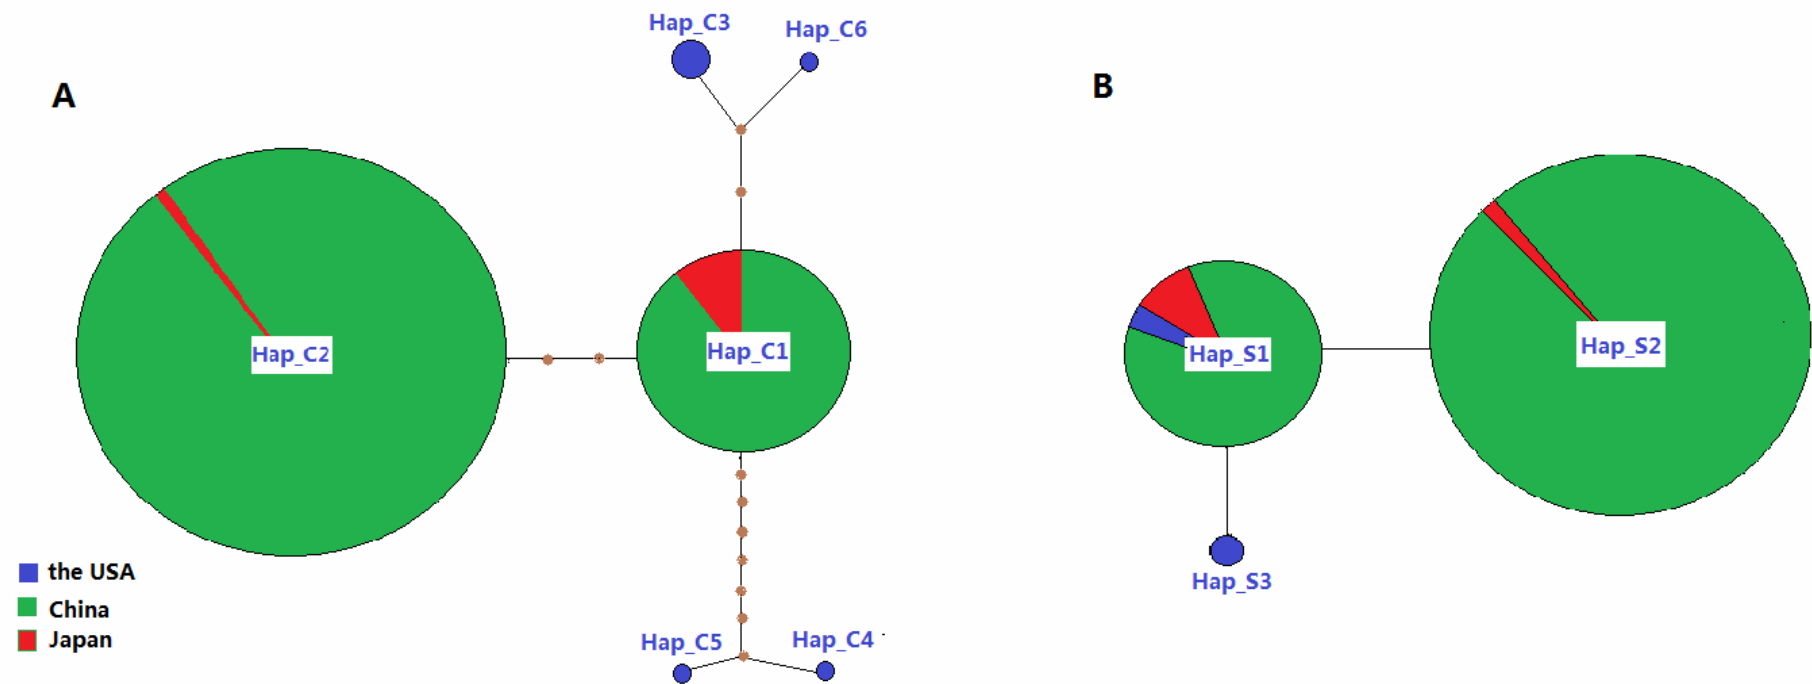

**Figure S2. Statistical parsimony networks of mtDNA COI (A) and 16S rDNA (B) sequences for *P. clarkii* samples.** Small brown dots represented missing haplotypes. Haplotypes were painted according to different geographical regions from which the sample was collected. Circle size was proportional to observed haplotype frequency.
